# Supplementary material for: A Simple and Low-Cost CRISPR/Cas9 Knockout System Widely Applicable to Insects
Source: MDPI journal article supplement (doi:10.3390/insects15050339), 2024-05-08

**Table S1 Primer sequences used in this study**

| Primer       | Sequence                                                    |
|--------------|-------------------------------------------------------------|
| Template 1-F | TAATACGACTCACTATATTGTGCAAATAGCATTCGTGGTTTTAGAGCTAGAAATAGC   |
| Template 2-F | TAATACGACTCACTATAGTTGTGCAAATAGCATTCGTGGTTTTAGAGCTAGAAATAGC  |
| Template 3-F | TAATACGACTCACTATAGGTTGTGCAAATAGCATTCGTGGTTTTAGAGCTAGAAATAGC |
| sgRNA-R      | AAAAAAAGCACCGACTCGGTGCCAC                                   |
| Target DNA-F | ATGCCACACTGGGTAACTGCTG                                      |
| Target DNA-R | GAAGAAACCTTGCGTCCGTGT                                       |
| KO-Test-F    | ACCTCACCGAAGTTAGTTACG                                       |
| KO-Test-R    | TTTGGACAGGTGTCAAATGGG                                       |

**Table S2 The reagents used in this study**

| Reagent                                                            | Company             | Code     |
|--------------------------------------------------------------------|---------------------|----------|
| 10×PCR Buffer (Mg <sup>2+</sup> free)                              | TAKARA              | 9151AM   |
| TAKARA Taq <sup>TM</sup>                                           | TAKARA              | R001B    |
| dNTP                                                               | TAKARA              | 4030Q    |
| 3M Sodium acetate                                                  | Promega             | P135A    |
| Acryl Carrier                                                      | Solarbio            | SA1020   |
| Guide-it <sup>TM</sup> Recombinant Cas9 (10 µg/µL)                 | TAKARA              | 632679   |
| E.Z.N.A® Gel Extraction Kit                                        | Omega               | D2500-03 |
| T7 RiboMAX <sup>TM</sup> Express Large Scale RNA Production System | Promega             | P1320    |
| DNAiso Regent                                                      | TAKARA              | 9770A    |
| NE Buffer3                                                         | New England BioLabs | B7003S   |
| T-Vector PMD <sup>TM</sup> 19 (Simple)                             | TAKARA              | 3271     |

**Figure S1 The profile of the T<sub>PMD19</sub>-sgRNA plasmid.**

$\xrightarrow{\text{Lac Z}}$   $\xrightarrow{\text{M13 F}}$   
 CGTATGTTGTGTGGAATTGTGAGCGGATAACAATTTACACAGGAAACAGCTATGACCATGATTAC  
 GCATACAACACACCTTAACACTCGCCTATTGTTAAAGTGTGTCCTTTGTCGATACTGGTACTAATG  
  
 GCCAAGTTTGCACGCCTGCCGTTTCGACGATTGTTTTAGAGCTAGAAATAGCAAGTTAAAATAAGGC  
 CGGTTCAAACGTGCGGACGGCAAGCTGCTAACAAAATCTCGATCTTTATCGTTCAATTTTATCCG  
 crRNA-tracrRNA (83bp)  
 TAGTCCGTTATCAACTTGAAAAAGTGGCACCGAGTCGGTGCTTTTTTTAATCTCTGGAAGATCCGC  
 ATCAGGCAATAGTTGAACTTTTTCACCGTGGCTCAGCCACGAAAAAATTAGAGACCTTCTAGGCG  
  
 GCGTACCGAGTTCTAATTCAGTGGCCGTCGTTTTACAACGTCGTGACTGGGAAAACCTGGCGTTA  
 CGCATGGCTCAAGATTAAGTGACCGGCAGCAAAATGTTGCAGCACTGACCCTTTTGGGACCGCAAT  
 $\xleftarrow{\text{M13 R}}$

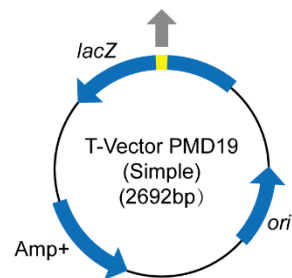

Supplement: s1 [file s1]
